# Supplementary material for: Selective Homogeneous Assay for Circulating Endopeptidase Fibroblast Activation Protein (FAP)
Source: PubMed Central journal article supplement (PMC5624913; doi:10.1038/s41598-017-12900-8), 2017-10-02

Supplementary information.

## **Selective Homogeneous Assay for Circulating Endopeptidase Fibroblast Activation Protein (FAP)**

**Travis W. Bainbridge<sup>1,+</sup>, Diana Ronai Dunshee<sup>2,+</sup>, Noelyn M. Kljavin<sup>3</sup>, Nicholas J. Skelton<sup>4</sup>, Junichiro Sonoda<sup>2,5,\*</sup> and James A. Ernst<sup>1,6,\*</sup>**

<sup>1</sup>Protein Chemistry, <sup>2</sup>Molecular Biology, <sup>3</sup>Molecular Oncology, <sup>4</sup>Discovery Chemistry, <sup>5</sup>Cancer Immunology, <sup>6</sup>Neuroscience, Genentech Inc., South San Francisco, CA, 94080, USA

**Supplementary Figure 1. Selective inhibitors of FAP or PREP.** (A) Cpd60, an FAP-selective inhibitor<sup>43</sup>. (B) KYP-2047, a PREP-specific inhibitor<sup>44,45</sup>.

**A**

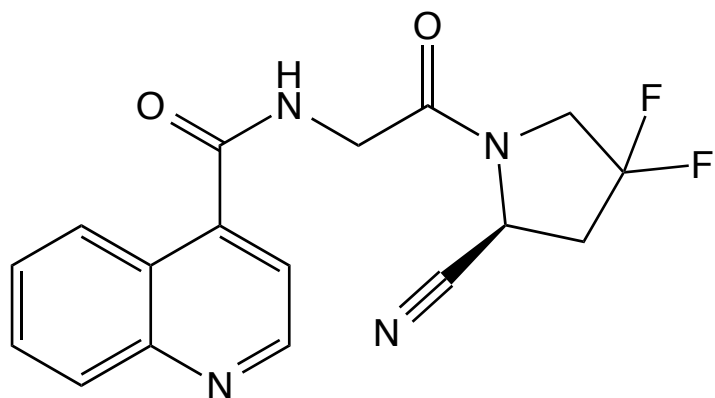

**B**

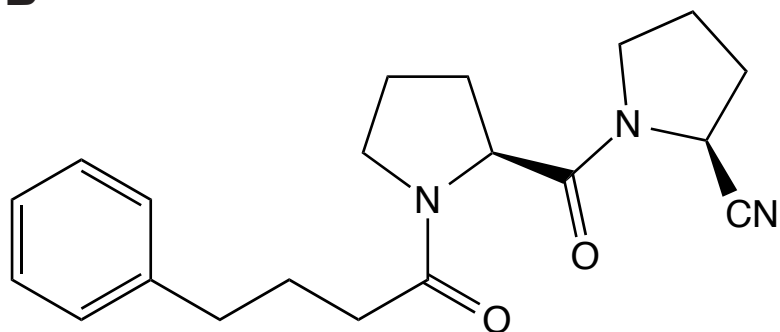

Supplement: 41598_2017_12900_MOESM1_ESM.pdf [file 41598_2017_12900_MOESM1_ESM.pdf]
